# Supplementary material for: Probing adenylation: using a fluorescently labelled ATP probe to directly label and immunoprecipitate VopS substrates
Source: Royal Society of Chemistry journal article supplement (doi:10.1039/c2mb25053e), 2012-03-28
Supplement: c2mb25053e.pdf [file c2mb25053e.pdf]

**Supplemental Information**  
**for**

Probing adenylation: Using a fluorescently labelled ATP probe to directly label and immunoprecipitate VopS substrates

Daniel M. Lewallen<sup>1</sup>, Caitlin Steckler<sup>2</sup>, Michael J. Chalmers<sup>2</sup>, Bryan Knuckley<sup>1</sup>, Paul R. Thompson<sup>1</sup>

<sup>1</sup>*Department of Chemistry, The Scripps Research Institute, Scripps Florida, 120 Scripps Way, Jupiter, Florida 33458,* <sup>2</sup>*Department of Molecular Therapeutics, The Scripps Research Institute, Scripps Florida, 130 Scripps Way, Jupiter, Florida 33458*

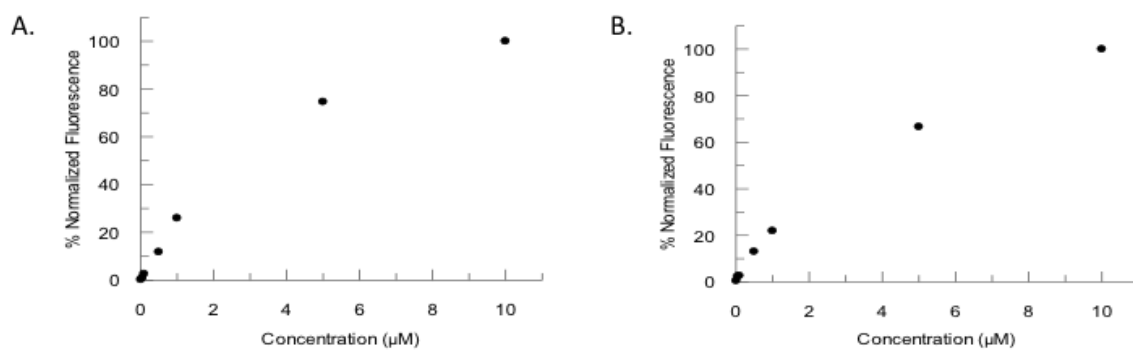

Figure S1: A) Quantified fluorescence from the fluorescent image from Figure 4A. B) Quantified fluorescence from the fluorescent image from Figure 4B

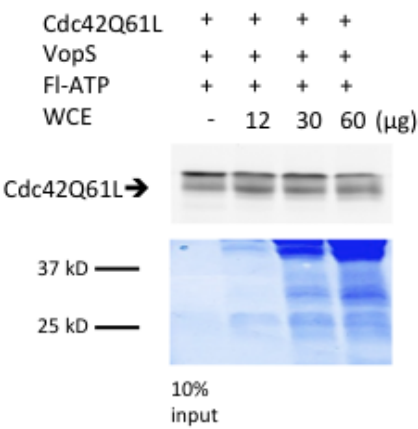

Figure S2: Labeling of Cdc42Q61L in MCF7 extracts. Increasing concentrations of MCF7 extracts were added to 5 μM Cdc42Q61L, 5 μM Fl-ATP and 1 μM VopSd30 (Lanes 2-4). Increasing amounts of WCE had little effect on the amount of labeling of Cdc42Q61L. The top panel is the fluorescent image. The bottom panel is the coomassie stained gel.

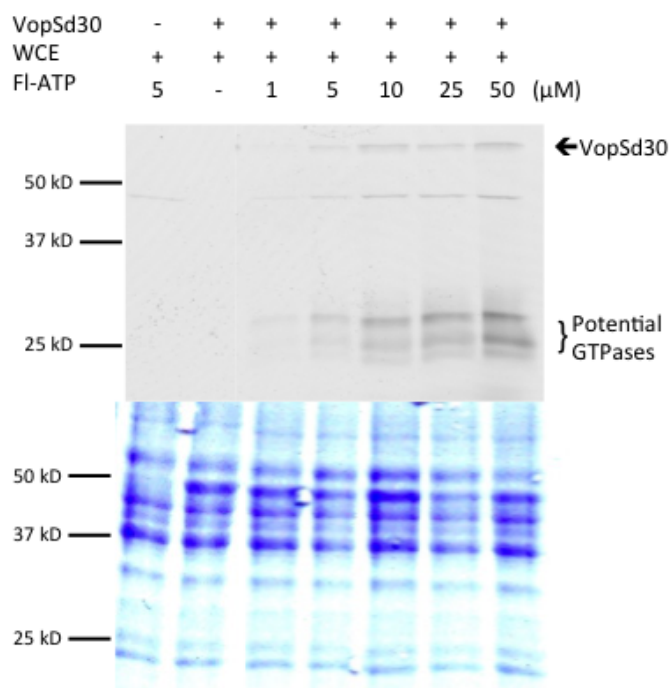

Figure S3: Labeling of MCF7 WCE with VopSd30 with increasing concentrations of Fl-ATP. VopS (1 μM) was added to 60 μg whole cell extract with different concentrations of Fl-ATP. The top panel is the fluorescent image. The bottom panel is the coomassie stained gel.

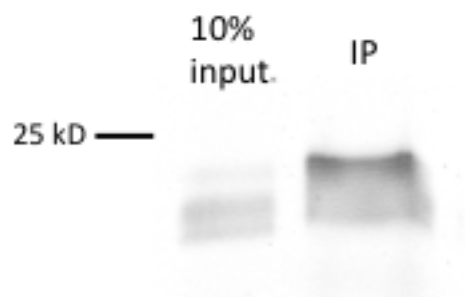

Figure S4: VopSd30 labels unknown substrates in MCF7 WCE which are then immunoprecipitated using  $\alpha$ -Fluorescein beads.
